# Supplementary material
Source: Springer Nature journal article supplement (https://www.springermedizin.de/resource/supplementary/12943_2009_477_MOESM2_ESM.pdf/9554388)

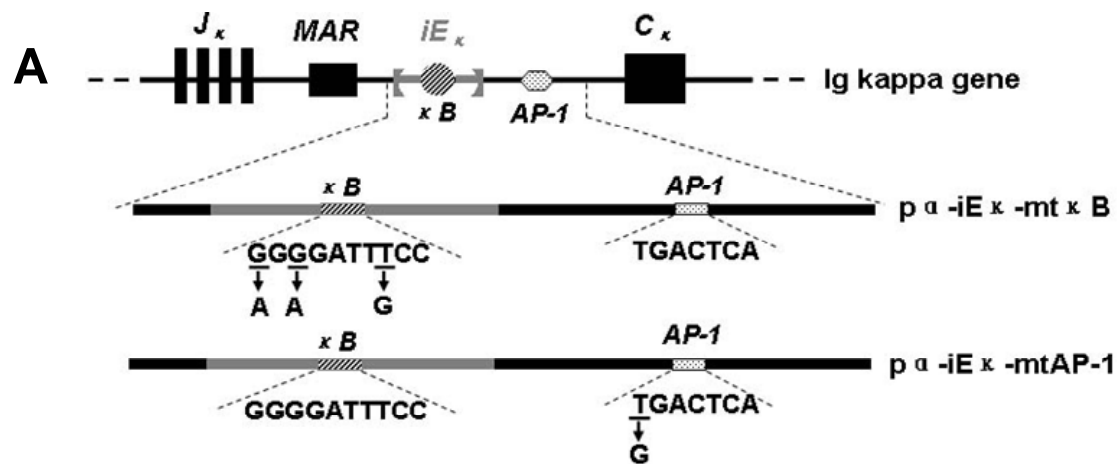

**B**

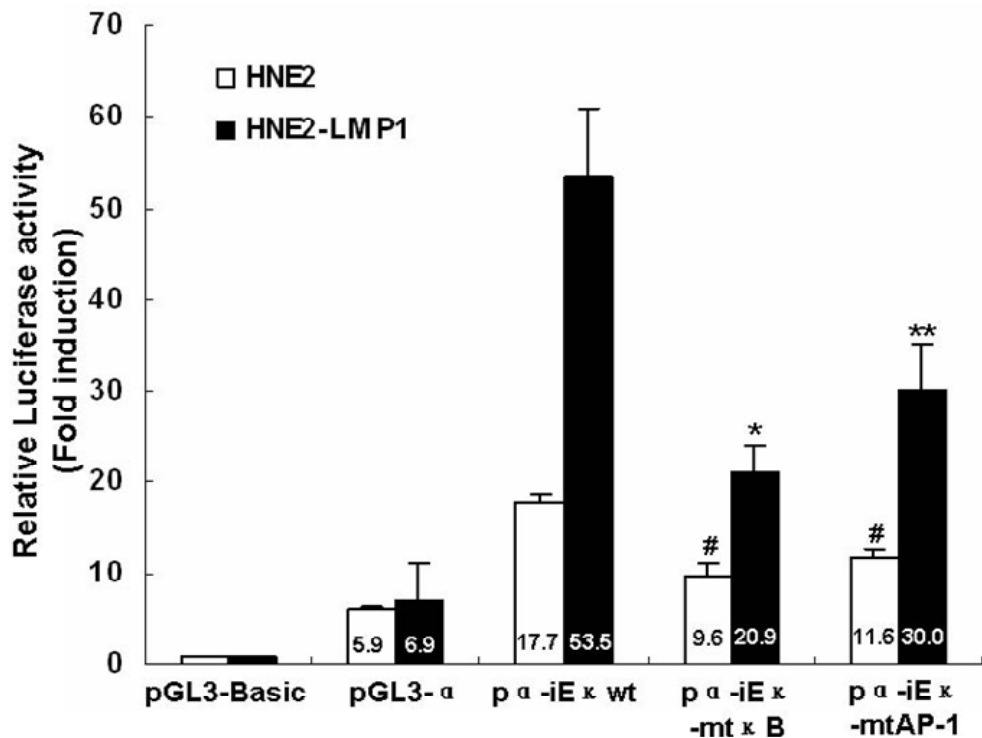

Supplement: MOESM2 [file 9554388]
